# Supplementary material for: Hepatoprotective Effect of Millettia dielsiana: In Vitro and In Silico Study
Source: MDPI journal article supplement (doi:10.3390/molecules27248978), 2022-12-16
Supplement: s1 [file s1]

# Hepatoprotective Effect of *Millettia dielsiana*: In Vitro and In Silico Study

Vu Thi Thu Le <sup>1</sup>, Dao Viet Hung <sup>1</sup>, Bui Minh Quy <sup>2</sup>, Pham Thi Hong Minh <sup>3,4</sup> and Do Tien Lam <sup>3,4,\*</sup>

<sup>1</sup> Thai Nguyen University of Agriculture and Forestry, Thai Nguyen University (TNU), Quyet Thang, Thai Nguyen 24119, Vietnam

<sup>2</sup> Thai Nguyen University of Sciences, Thai Nguyen University (TNU), Tan Thinh, Thai Nguyen 24119, Vietnam;

<sup>3</sup> Institute of Natural Products Chemistry, Vietnam Academy of Science and Technology (VAST), 18 Hoang Quoc Viet, Cau Giay, Hanoi 10072, Vietnam

<sup>4</sup> Graduate University of Science and Technology, Vietnam Academy of Science and Technology (VAST), 18 Hoang Quoc Viet, Cau Giay, Hanoi 10072, Vietnam

\* Correspondence: dotienlam198@gmail.com; Tel.: +84-9-8985-6515

**Table S1:** *In silico* Docking of 50 isolated compounds from *Millettia dielsiana* against PI3K/mTOR

| No. | Symbol     | Name of compounds                                                                                                  | $\Delta G$<br>(kcal/mol) | Structural Formula                                                                   |
|-----|------------|--------------------------------------------------------------------------------------------------------------------|--------------------------|--------------------------------------------------------------------------------------|
| 1   | D15<br>(1) | <i>Trans</i> -3- <i>O</i> - <i>p</i> -hydroxycinnamoyl ursolic acid                                                | -9.237                   | 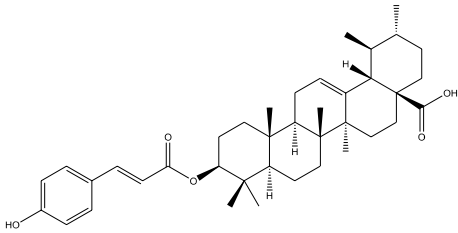 |
| 2   | D50<br>(2) | 5,7,4'-trihydroxyisoflavone 7- <i>O</i> - $\beta$ -D-apiofuranosyl-(1 $\rightarrow$ 6)- $\beta$ -D-glucopyranoside | -9.083                   |  |
| 3   | D49        | Genistin                                                                                                           | -8.914                   |  |

|    |     |                                                                                    |        |                                                                                       |
|----|-----|------------------------------------------------------------------------------------|--------|---------------------------------------------------------------------------------------|
| 4  | D40 | Daidzin                                                                            | -8.754 | 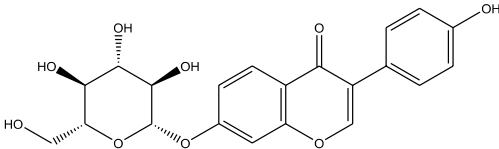    |
| 5  | D20 | Durmillone                                                                         | -8.445 |    |
| 6  | D38 | Millesianin F                                                                      | -8.372 |     |
| 7  | D42 | 7-hydroxy-4',6-dimethoxyisoflavone-7-O-β-D-apiofuranosyl-(1→6)-β-D-glucopyranoside | -8.307 |   |
| 8  | D31 | Millesianin D                                                                      | -8.213 |  |
| 9  | D39 | Millesianin G                                                                      | -8.209 |   |
| 10 | D23 | Hydroxy-6-methoxy-3-4-methylenedioxy-8-3-3-dimethylallyl-isoflavone                | -8.138 |  |

|    |     |                                                                                                                                  |        |  |
|----|-----|----------------------------------------------------------------------------------------------------------------------------------|--------|--|
| 11 | D45 | 7-hydroxy-4',8-dimethoxyisoflavone<br>7- <i>O</i> - $\beta$ -D-apiofuranosyl-<br>(1 $\rightarrow$ 6)- $\beta$ -D-glucopyranoside | -8.127 |  |
| 12 | D28 | Millesianin A                                                                                                                    | -8.074 |  |
| 13 | D19 | Ichthynone                                                                                                                       | -8.067 |  |
| 14 | D25 | Millesianin D                                                                                                                    | -8.046 |  |
| 15 | D47 | Odoratin-7- <i>O</i> - $\beta$ -D-glucopyranoside                                                                                | -7.981 |  |

|    |     |                                                                    |        |                                                                                       |
|----|-----|--------------------------------------------------------------------|--------|---------------------------------------------------------------------------------------|
| 16 | D22 | Calopogonium<br>A isoflavone                                       | -7.969 | 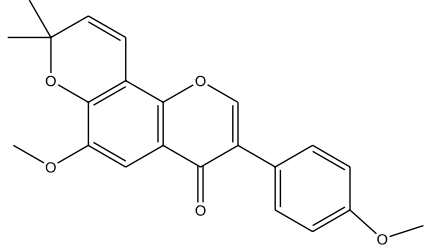   |
| 17 | D32 | Millesianin E                                                      | -7.968 |    |
| 18 | D44 | 7-hydroxy-4',8-dimethoxyisoflavone-7-O- $\beta$ -D-glucopyranoside | -7.929 |    |
| 19 | D41 | Claclrastin-7-O- $\beta$ -D-glucopyranoside                        | -7.927 |   |
| 20 | D5  | Liquiritigenin                                                     | -7.825 |  |
| 21 | D4  | Isoliquiritigenin                                                  | -7.822 |  |

|    |     |               |        |                                                                                       |
|----|-----|---------------|--------|---------------------------------------------------------------------------------------|
| 22 | D43 | Wistin        | -7.803 | 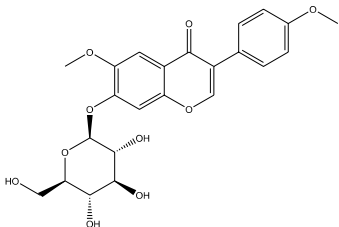   |
| 23 | D18 | Barbigerone   | -7.721 |    |
| 24 | D10 | Tupichinol C  | -7.67  |    |
| 25 | D46 | Glycitin      | -7.652 |   |
| 26 | D30 | Millesianin C | -7.631 |  |
| 27 | D33 | Afromosin     | -7.627 |  |

|    |     |                                 |        |                                                                                       |
|----|-----|---------------------------------|--------|---------------------------------------------------------------------------------------|
| 28 | D35 | Cladrastin                      | -7.623 | 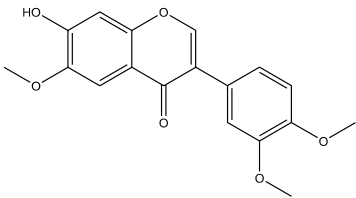   |
| 29 | D16 | Millesianin C                   | -7.618 |    |
| 30 | D48 | Dalpatin                        | -7.582 |   |
| 31 | D21 | Methoxycalpogonium isoflavone A | -7.557 |  |
| 32 | D2  | Formononetin                    | -7.512 |  |
| 33 | D17 | Durallone                       | -7.482 |  |

|    |     |                 |        |                                                                                       |
|----|-----|-----------------|--------|---------------------------------------------------------------------------------------|
| 34 | D6  | Naringenin      | -7.478 | 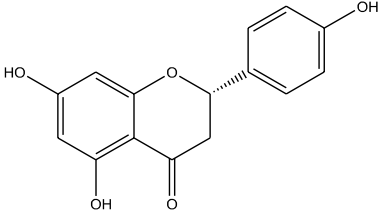   |
| 35 | D27 | Dielsianone     | -7.475 |    |
| 36 | D29 | Millesianin B   | -7.347 |    |
| 37 | D8  | Catechin        | -7.316 |   |
| 38 | D11 | (+)-Epicatechin | -7.241 |  |
| 39 | D36 | Daidzein        | -7.214 |  |
| 40 | D3  | Ononin          | -7.192 |  |

|    |     |                 |        |                                                                                      |
|----|-----|-----------------|--------|--------------------------------------------------------------------------------------|
| 41 | D7  | Gallocatechin   | -7.069 | 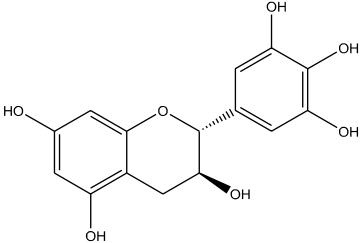  |
| 42 | D37 | Hernancorizin   | -6.995 |   |
| 43 | D24 | Millesianin H   | -6.826 |  |
| 44 | D1  | Mildiside A     | -6.808 |  |
| 45 | D34 | Caviunin        | -6.741 |  |
| 46 | D12 | (-)-Epicatechin | -6.736 |  |



|    |      |                            |        |                                                                                       |
|----|------|----------------------------|--------|---------------------------------------------------------------------------------------|
| 47 | D26  | Millesianin I              | -6.718 | 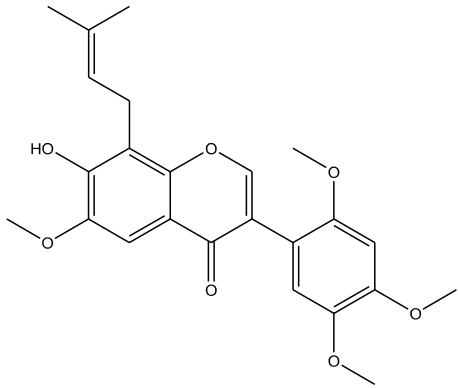    |
| 48 | D9   | (3 <i>S</i> )-Vestitol     | -6.467 |     |
| 49 | D14  | <i>Trans</i> -Ferulic acid | -6.193 |   |
| 50 | D13  | Protocatechuic acid        | -5.046 |  |
| 51 | Ref. | PI3Kalpha/mTOR-IN-1        | -9.12  |  |
